# Supplementary material for: Nanospherical solid electrolyte interface layer formation in binder-free carbon nanotube aerogel/Si nanohybrids to provide lithium-ion battery anodes with a long-cycle life and high capacity
Source: Royal Society of Chemistry journal article supplement (doi:10.1039/c7nr00965h), 2017-01-01
Supplement: c7nr00965h1.pdf [file c7nr00965h1.pdf]

## Supporting Information

# Nanospherical Solid Electrolyte Interface Layer Formation in Binder-Free Carbon Nanotube Aerogel / Si Nanohybrids to Provide Lithium-Ion Battery Anodes with Long-Cycle Life and High Capacity

*Hyung Cheoul Shim,<sup>\*a</sup> Ilhwan Kim,<sup>a,b</sup> Chang-Su Woo,<sup>a</sup> Hoo-Jeong Lee<sup>b</sup> and Seungmin Hyun<sup>\*a</sup>*

<sup>a</sup> Department of Nano-Mechanics, Korea Institute of Machinery & Materials (KIMM), 156,  
Gajeongbuk-ro, Yuseong-gu, Daejeon, 34103, Republic of Korea

<sup>b</sup> Department of Advanced Materials Science and Engineering, Sungkyunkwan University,  
2066, Seobu-ro, Jangan-gu, Suwon-si, Gyeonggi-do, 16419, Republic of Korea

E-mail: [scafes@kimm.re.kr](mailto:scafes@kimm.re.kr), [hyun@kimm.re.kr](mailto:hyun@kimm.re.kr)

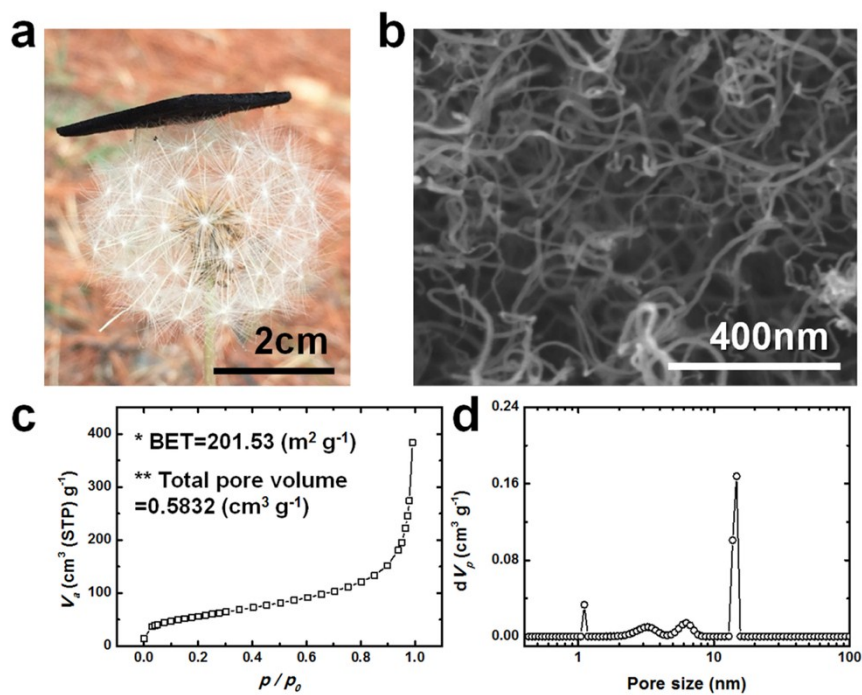

**Fig. S1** (a) The photo of CNT aerogel plate. (b) SEM image of CNT aerogel. (c)  $\text{N}_2$  adsorption isotherms of CNT aerogel. (d) Meso-pore size distribution of the CNT aerogel.

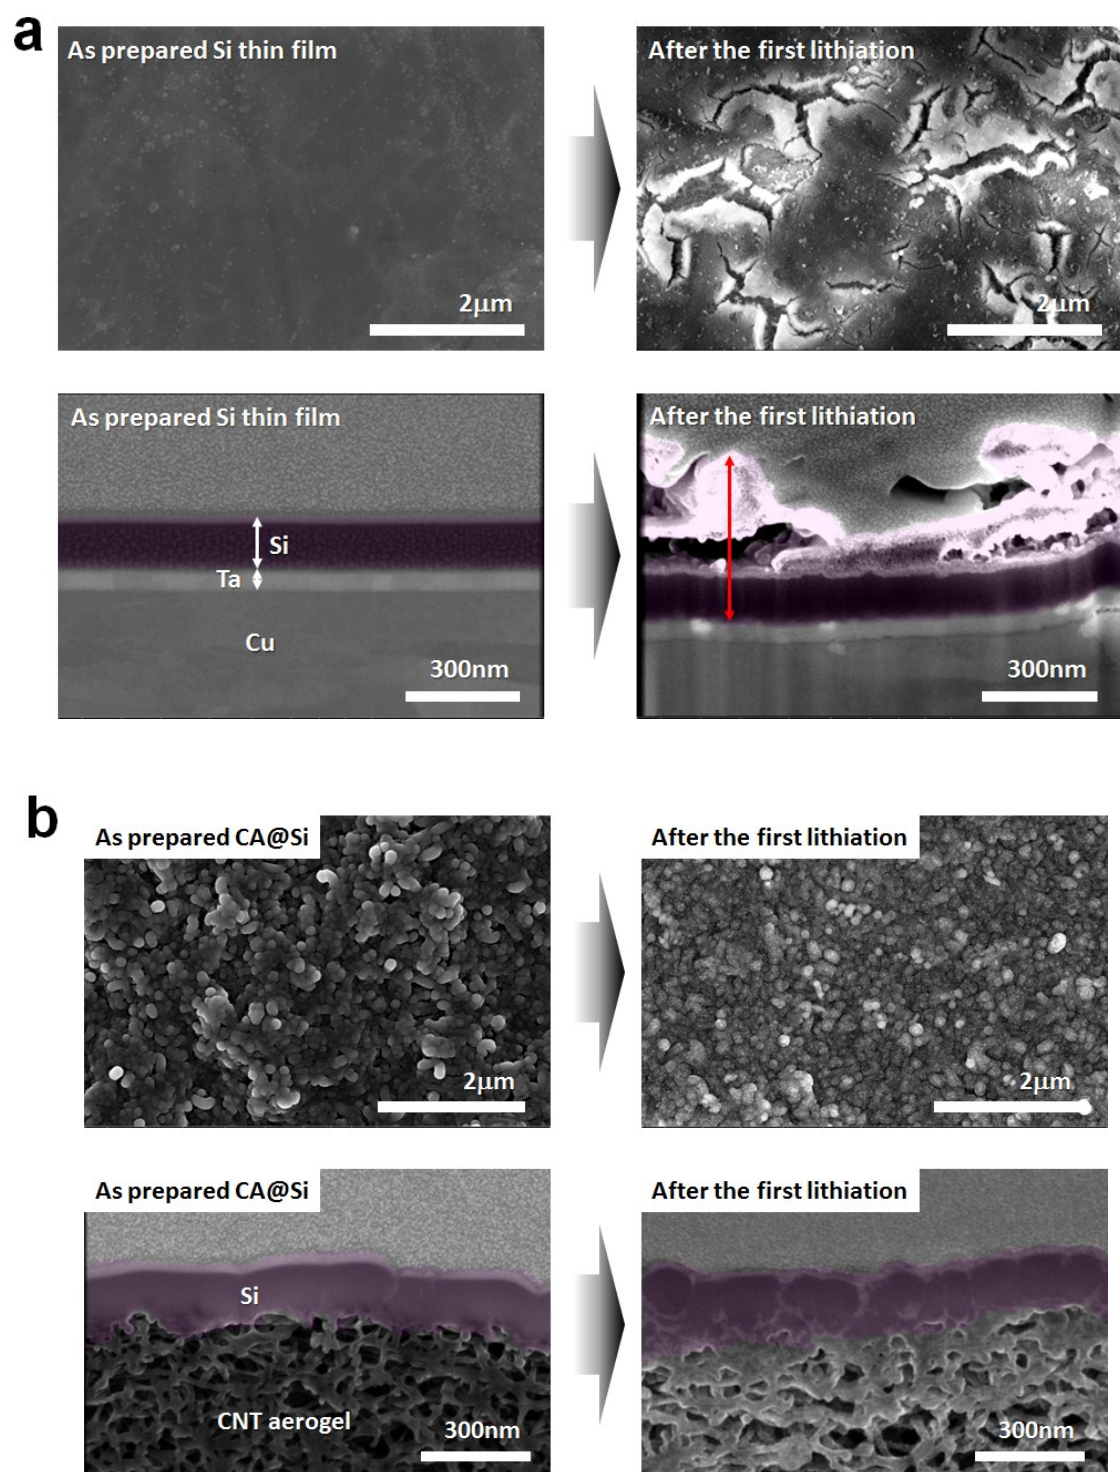

**Fig. S2** The SEM and cross sectional SEM images of (a) Si thin film, (b) CA@Si before and after the first lithiation process

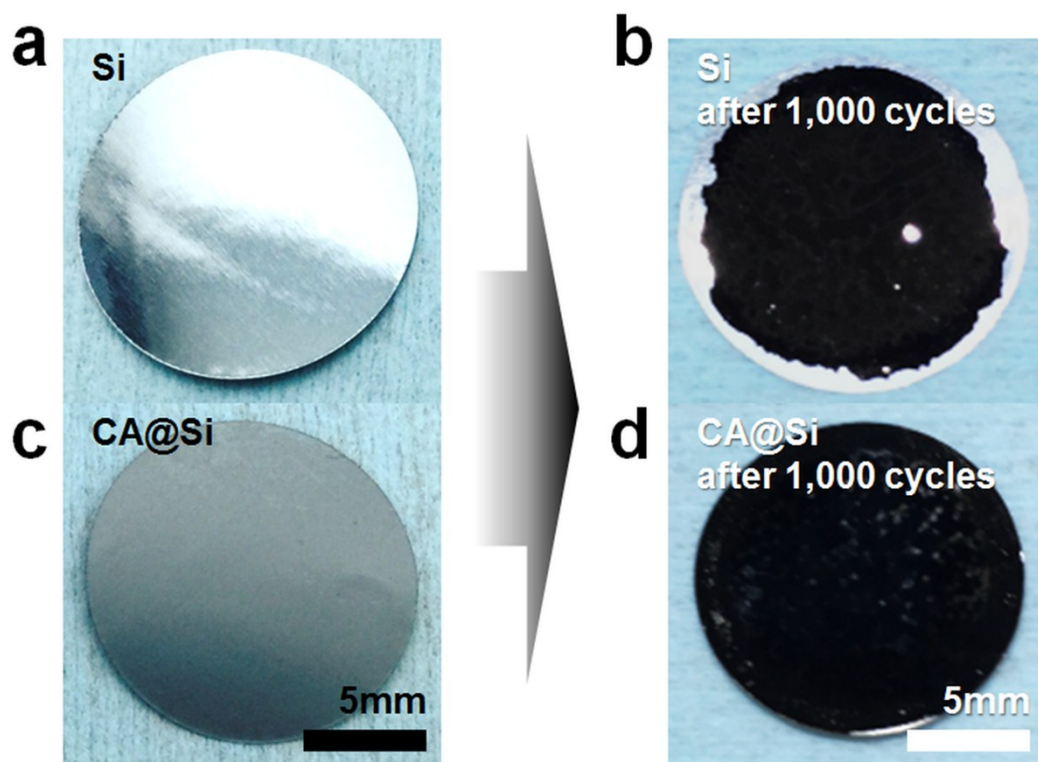

**Fig. S3** Optical images of the Si and CA@Si electrode before and after cycling.

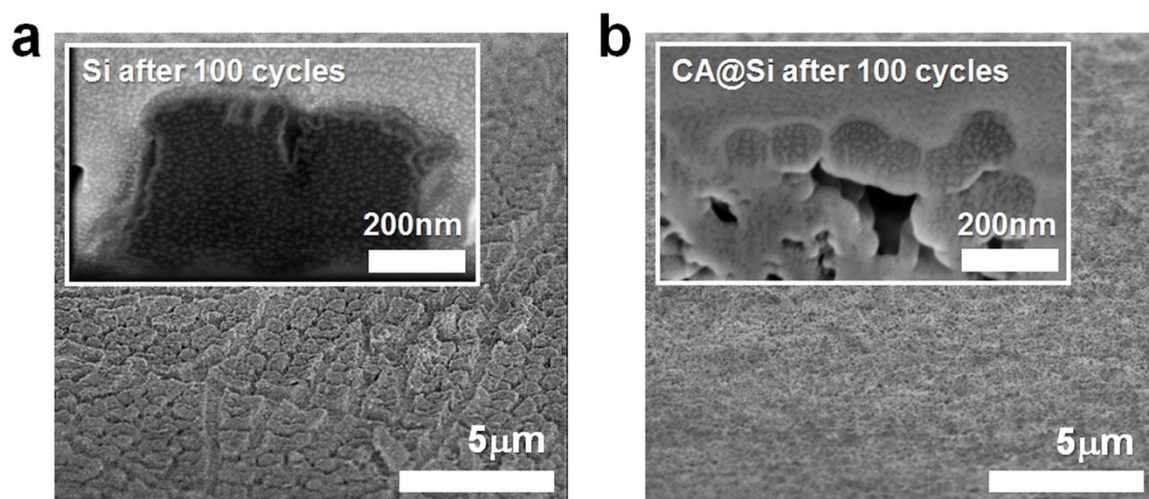

**Fig. S4** Tilted FESEM images of the (a) Si and (b) CA@Si after cycling. The inset shows the corresponding cross-sectional FESEM images obtained using FIB techniques.

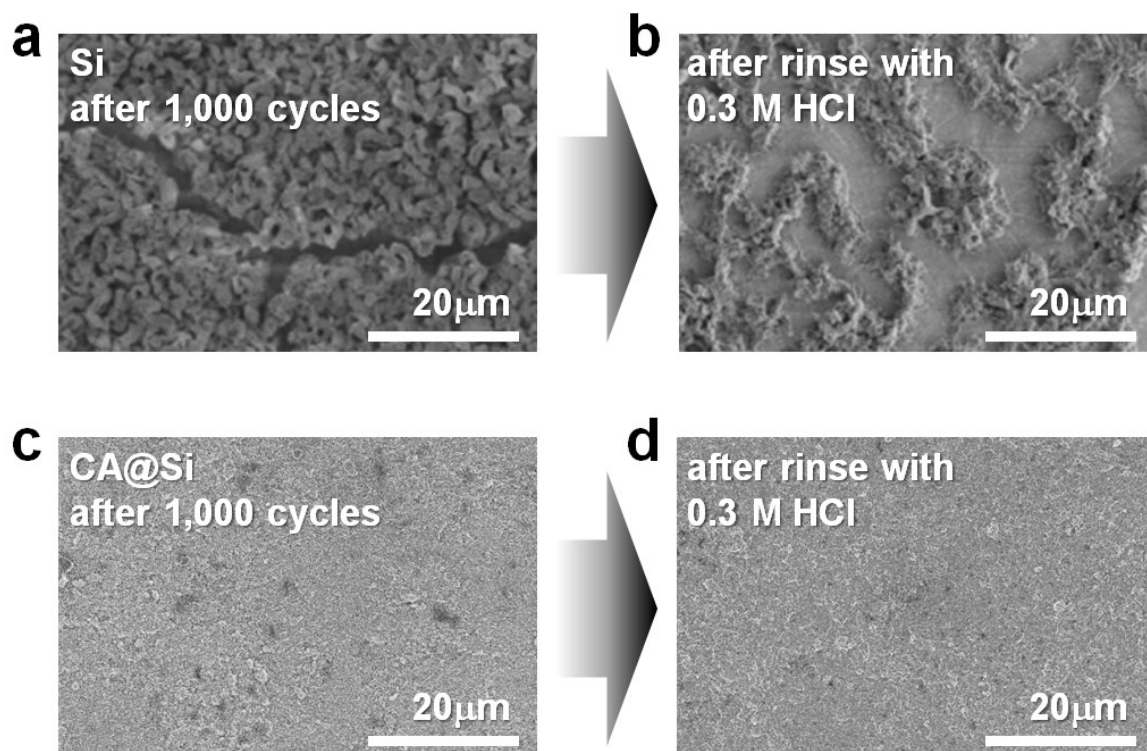

**Fig. S5** FESEM image of the (a) Si and (c) CA@Si electrode after cycling. FESEM image of the (b) Si and (d) CA@Si after 1000 cycles with selective removal of SEI layers using chemical etching.



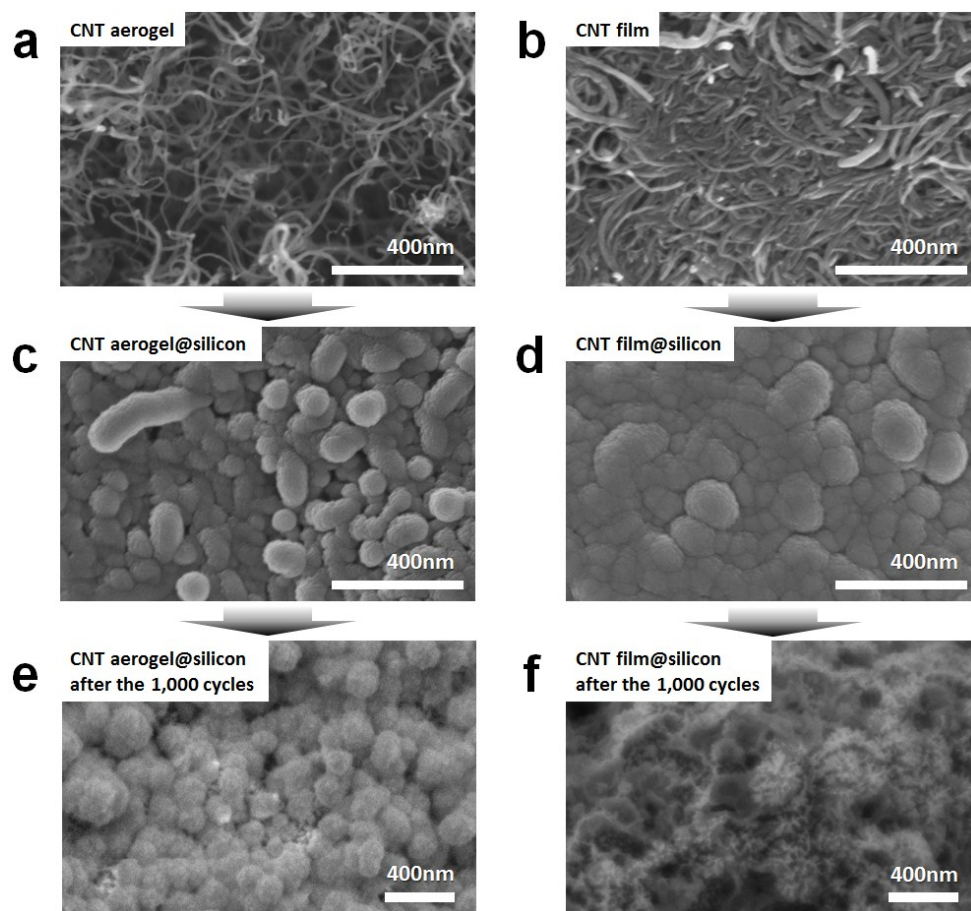

**Fig. S6** FESEM images of (a) CNT aerogel (CA), (b) CNT film (CF), (c) Silicon deposited onto CA (CA@Si), (d) Silicon deposited onto CF (CF@Si), (e) CA@Si and (f) CF@Si after 1,000 electrochemical cycles.

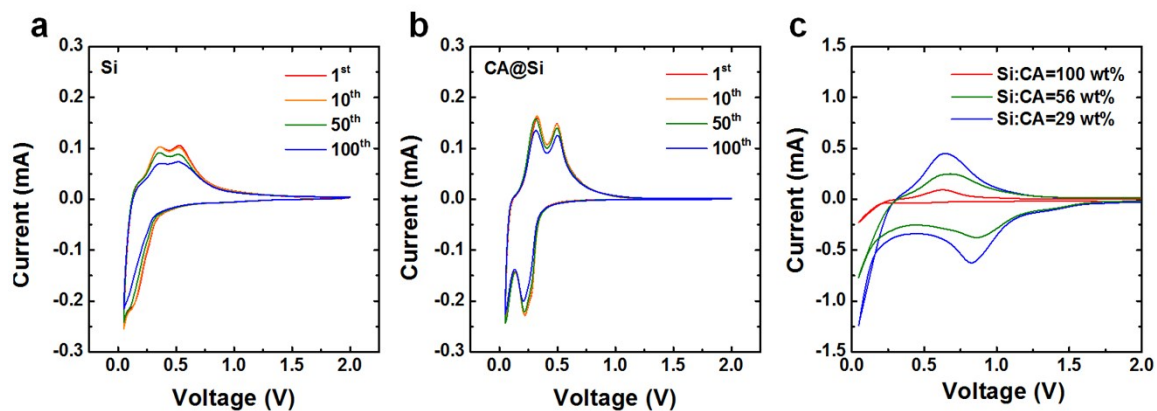

**Fig. S7** CV curves (scan rate:  $0.1 \text{ mV s}^{-1}$ ) of the 1, 10, 50, 100 cycles for (a) Si, (b) CA@Si electrodes. (c) CV curves of the CA@Si electrode for various Si/CA ratios.

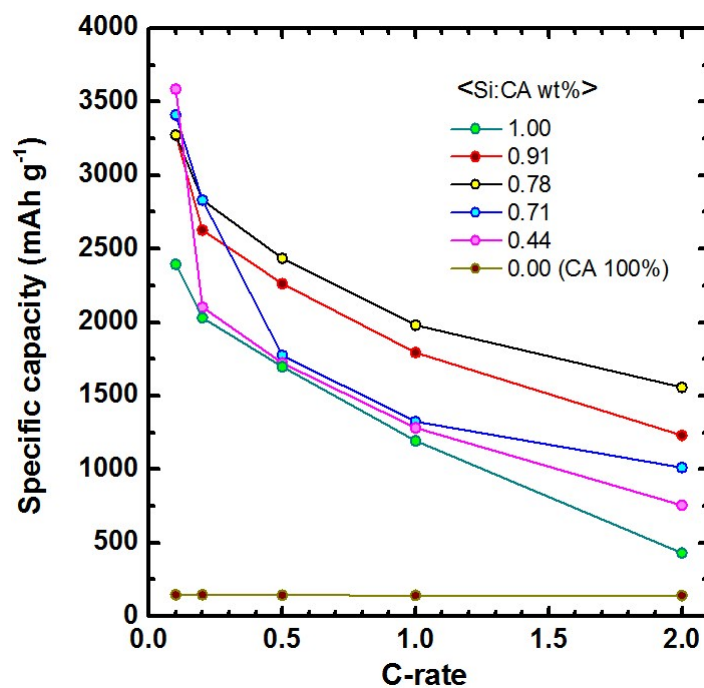

**Fig. S8** The rate capabilities of CA@Si nanohybrids with different Si/CA ratio.

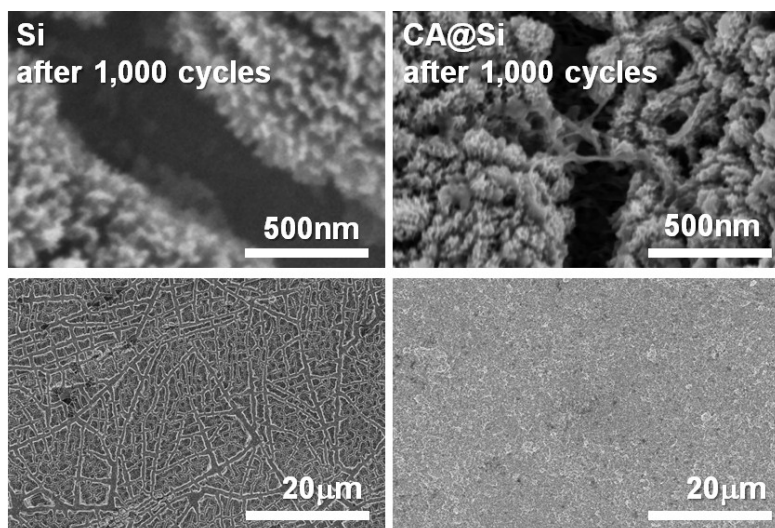

**Fig. S9** FESEM image of the Si and CA@Si electrode after 1,000 cycles with selective removal of SEI layers using chemical etching. Note that the CNT aerogel maintained the conducting networks in the CA@Si electrode, while the cycled Si electrode lost the conducting path after cycling.

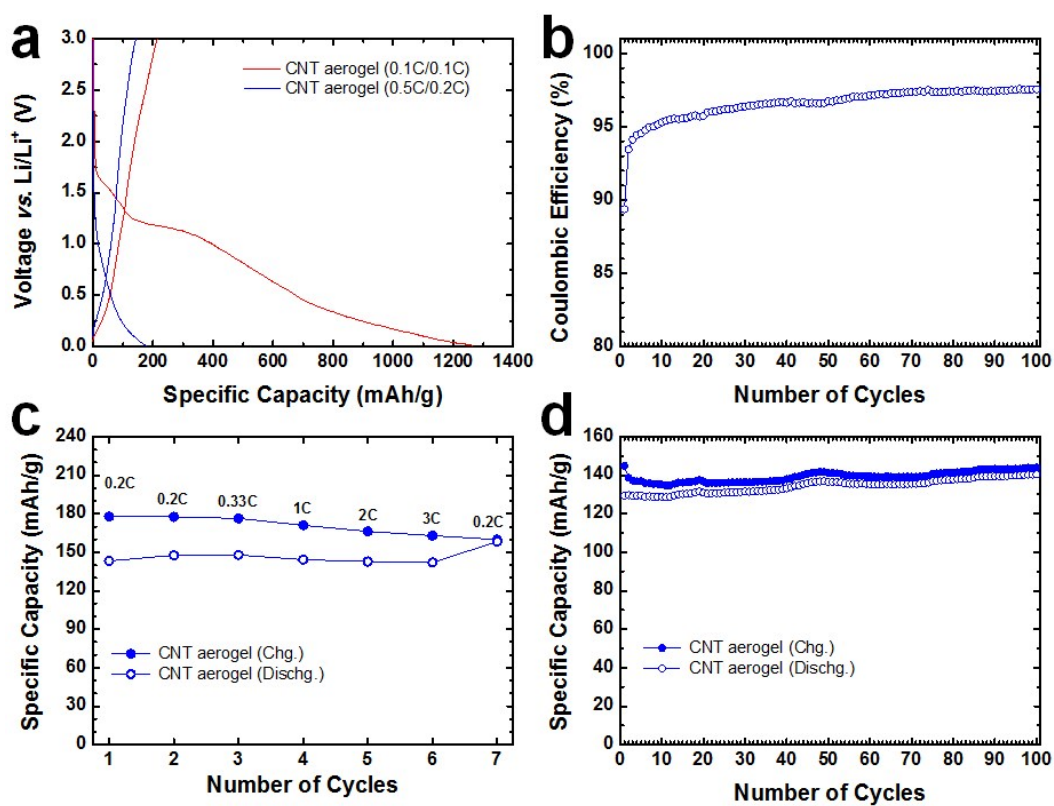



**Fig. S10** Electrochemical performance of the CA. (a) charge-discharge profiles, (b) Coulombic efficiency, (c) rate capability and (d) charge-discharge curve as a function of the number for cycles.
